# Supplementary material
Source: PubMed Central journal article supplement (PMC10264157)
Supplement: NIHMS1877990-supplement-Table_S1.pdf [file NIHMS1877990-supplement-Table_S1.pdf]

**Table S1. The genotypes of fly lines used in this study (Related to the STAR Methods)**

| No. figure       | Symbol                                                                         | Genotype                                                                                |
|------------------|--------------------------------------------------------------------------------|-----------------------------------------------------------------------------------------|
| <b>Figure 1</b>  |                                                                                |                                                                                         |
| A                | Control                                                                        | <i>elav-Gal4, Tub-Gal80<sup>ts</sup>/+; UAS-Control-(GR)<sub>80</sub>/+</i>             |
|                  | Poly(GR)                                                                       | <i>elav-Gal4, Tub-Gal80<sup>ts</sup>, UAS-(GR)<sub>80</sub>/+</i>                       |
| F                | <i>Cont-(GR)<sub>80</sub></i>                                                  | <i>elav-Gal4, Tub-Gal80<sup>ts</sup>/+; UAS-Control-(GR)<sub>80</sub>/+</i>             |
|                  | <i>(GR)<sub>80</sub></i>                                                       | <i>elav-Gal4, Tub-Gal80<sup>ts</sup>, UAS-(GR)<sub>80</sub>/+</i>                       |
| G and I          | +/+                                                                            | <i>GMR-Gal4, Tub-Gal80<sup>ts</sup>/+</i>                                               |
|                  | <i>UAS-(GR)<sub>80</sub>/+</i>                                                 | <i>GMR-Gal4, Tub-Gal80<sup>ts</sup>, UAS-(GR)<sub>80</sub>/+</i>                        |
|                  | <i>Mtk<sup>R1</sup>/+</i>                                                      | <i>GMR-Gal4, Tub-Gal80<sup>ts</sup>, UAS-(GR)<sub>80</sub>/Mtk<sup>R1</sup></i>         |
|                  | <i>Dpt<sup>SK1</sup>/+</i>                                                     | <i>GMR-Gal4, Tub-Gal80<sup>ts</sup>, UAS-(GR)<sub>80</sub>/Dpt<sup>SK1</sup></i>        |
| H and I          | <i>GMR-Gal4, Gal80<sup>ts</sup>/UAS-GFP</i>                                    | <i>GMR-Gal4, Tub-Gal80<sup>ts</sup>/UAS-GFP</i>                                         |
|                  | <i>UAS-GFP/+</i>                                                               | <i>GMR-Gal4, Tub-Gal80<sup>ts</sup>, UAS-(GR)<sub>80</sub>/UAS-GFP</i>                  |
|                  | <i>UAS-Mtk RNAi/+</i>                                                          | <i>GMR-Gal4, Tub-Gal80<sup>ts</sup>, UAS-(GR)<sub>80</sub>/+; UAS-Mtk RNAi-1/+</i>      |
|                  |                                                                                |                                                                                         |
| J                | <i>elav-Gal4, Gal80<sup>ts</sup>/+; Cont-(GR)<sub>80</sub>/+</i>               | <i>elav-Gal4, Tub-Gal80<sup>ts</sup>/+; UAS-Control-(GR)<sub>80</sub>/+</i>             |
|                  | <i>UAS-mCherry RNAi/+</i>                                                      | <i>elav-Gal4, Tub-Gal80<sup>ts</sup>, UAS-(GR)<sub>80</sub>/+; UAS-mCherry RNAi/+</i>   |
|                  | <i>UAS-Mtk RNAi-1/+</i>                                                        | <i>elav-Gal4, Tub-Gal80<sup>ts</sup>, UAS-(GR)<sub>80</sub>/+; UAS-Mtk RNAi-1/+</i>     |
|                  | <i>UAS-Mtk RNAi-2/+</i>                                                        | <i>elav-Gal4, Tub-Gal80<sup>ts</sup>, UAS-(GR)<sub>80</sub>/UAS-Mtk RNAi-2</i>          |
|                  | <i>UAS-Mtk RNAi-3/+</i>                                                        | <i>elav-Gal4, Tub-Gal80<sup>ts</sup>, UAS-(GR)<sub>80</sub>/+; UAS-Mtk RNAi-3/+</i>     |
|                  | <i>UAS-Mtk/+</i>                                                               | <i>elav-Gal4, Tub-Gal80<sup>ts</sup>, UAS-(GR)<sub>80</sub>/UAS-Mtk</i>                 |
| <b>Figure 2</b>  |                                                                                |                                                                                         |
| B and D          | <i>GMR-Gal4, Gal80<sup>ts</sup>/UAS-GFP</i>                                    | <i>GMR-Gal4, Tub-Gal80<sup>ts</sup>/UAS-GFP</i>                                         |
|                  | <i>UAS-GFP/+</i>                                                               | <i>GMR-Gal4, Tub-Gal80<sup>ts</sup>, UAS-(GR)<sub>80</sub>/UAS-GFP</i>                  |
|                  | <i>UAS-Hsp90 RNAi/+</i>                                                        | <i>GMR-Gal4, Tub-Gal80<sup>ts</sup>, UAS-(GR)<sub>80</sub>/+; UAS-Hsp90 RNAi/+</i>      |
| C and D          | <i>GMR-Gal4, Gal80<sup>ts</sup>/+</i>                                          | <i>GMR-Gal4, Tub-Gal80<sup>ts</sup>/+</i>                                               |
|                  | +/+                                                                            | <i>GMR-Gal4, Tub-Gal80<sup>ts</sup>, UAS-(GR)<sub>80</sub>/+</i>                        |
|                  | <i>Hsp90<sup>e6A</sup>/+</i>                                                   | <i>GMR-Gal4, Tub-Gal80<sup>ts</sup>, UAS-(GR)<sub>80</sub>/+; Hsp90<sup>e6A</sup>/+</i> |
|                  | <i>Hsp90<sup>e6D</sup>/+</i>                                                   | <i>GMR-Gal4, Tub-Gal80<sup>ts</sup>, UAS-(GR)<sub>80</sub>/+; Hsp90<sup>e6D</sup>/+</i> |
|                  | <i>Hsf<sup>1</sup>/+</i>                                                       | <i>GMR-Gal4, Tub-Gal80<sup>ts</sup>, UAS-(GR)<sub>80</sub>/+; Hsf<sup>1</sup>/+</i>     |
|                  | <i>UAS-Hsp90/+</i>                                                             | <i>GMR-Gal4, Tub-Gal80<sup>ts</sup>, UAS-(GR)<sub>80</sub>/UAS-Hsp90</i>                |
| E                | <i>GMR-Gal4, Gal80<sup>ts</sup>/UAS-GFP</i>                                    | <i>GMR-Gal4, Tub-Gal80<sup>ts</sup>/UAS-GFP</i>                                         |
|                  | <i>GMR-Gal4, Gal80<sup>ts</sup>/+; UAS-Hsp90 RNAi/+</i>                        | <i>GMR-Gal4, Tub-Gal80<sup>ts</sup>/+; UAS-Hsp90 RNAi/+</i>                             |
|                  | <i>GMR-Gal4, Gal80<sup>ts</sup>, UAS-(GR)<sub>80</sub>/UAS-GFP</i>             | <i>GMR-Gal4, Tub-Gal80<sup>ts</sup>, UAS-(GR)<sub>80</sub>/UAS-GFP</i>                  |
|                  | <i>GMR-Gal4, Gal80<sup>ts</sup>, UAS-(GR)<sub>80</sub>/+; UAS-Hsp90 RNAi/+</i> | <i>GMR-Gal4, Tub-Gal80<sup>ts</sup>, UAS-(GR)<sub>80</sub>/+; UAS-Hsp90 RNAi/+</i>      |
| F                | <i>GMR-Gal4, Gal80<sup>ts</sup>/UAS-GFP</i>                                    | <i>GMR-Gal4, Tub-Gal80<sup>ts</sup>/UAS-GFP</i>                                         |
|                  | <i>UAS-GFP/+</i>                                                               | <i>GMR-Gal4, Tub-Gal80<sup>ts</sup>, UAS-(GR)<sub>80</sub>/UAS-GFP</i>                  |
|                  | <i>UAS-Hsp90 RNAi/+</i>                                                        | <i>GMR-Gal4, Tub-Gal80<sup>ts</sup>, UAS-(GR)<sub>80</sub>/+; UAS-Hsp90 RNAi/+</i>      |
| <b>Figure 3</b>  |                                                                                |                                                                                         |
| A and B          | <i>GMR-Gal4, Gal80<sup>ts</sup>/UAS-GFP</i>                                    | <i>GMR-Gal4, Tub-Gal80<sup>ts</sup>/UAS-GFP</i>                                         |
|                  | <i>UAS-GFP/+</i>                                                               | <i>GMR-Gal4, Tub-Gal80<sup>ts</sup>, UAS-(GR)<sub>80</sub>/UAS-GFP</i>                  |
|                  | <i>UAS-TopoII RNAi-1/+</i>                                                     | <i>GMR-Gal4, Tub-Gal80<sup>ts</sup>, UAS-(GR)<sub>80</sub>/+; UAS-TopoII RNAi-1/+</i>   |
|                  | <i>UAS-TopoII RNAi-2/+</i>                                                     | <i>GMR-Gal4, Tub-Gal80<sup>ts</sup>, UAS-(GR)<sub>80</sub>/+; UAS-TopoII RNAi-2/+</i>   |
| C and D          | <i>GMR-Gal4, Gal80<sup>ts</sup>/UAS-GFP</i>                                    | <i>GMR-Gal4, Tub-Gal80<sup>ts</sup>/UAS-GFP</i>                                         |
|                  | <i>GMR-Gal4, Gal80<sup>ts</sup>, UAS-(GR)<sub>80</sub>/+</i>                   | <i>GMR-Gal4, Tub-Gal80<sup>ts</sup>, UAS-(GR)<sub>80</sub>/+</i>                        |
| E                | <i>elav-Gal4, Gal80<sup>ts</sup>/+; Cont-(GR)<sub>80</sub>/+</i>               | <i>elav-Gal4, Tub-Gal80<sup>ts</sup>/+; UAS-Control-(GR)<sub>80</sub>/+</i>             |
|                  | <i>UAS-mCherry RNAi/+</i>                                                      | <i>elav-Gal4, Tub-Gal80<sup>ts</sup>, UAS-(GR)<sub>80</sub>/+; UAS-mCherry RNAi/+</i>   |
|                  | <i>UAS-TopoII RNAi/+</i>                                                       | <i>elav-Gal4, Tub-Gal80<sup>ts</sup>, UAS-(GR)<sub>80</sub>/+; UAS-TopoII RNAi-2/+</i>  |
|                  | <i>UAS-Hsp90 RNAi/+</i>                                                        | <i>elav-Gal4, Tub-Gal80<sup>ts</sup>, UAS-(GR)<sub>80</sub>/+; UAS-Hsp90 RNAi/+</i>     |
| <b>Figure 4</b>  |                                                                                |                                                                                         |
| A-C              | <i>GMR-Gal4, Gal80<sup>ts</sup>/UAS-GFP</i>                                    | <i>GMR-Gal4, Tub-Gal80<sup>ts</sup>/UAS-GFP</i>                                         |
|                  | <i>GMR-Gal4, Gal80<sup>ts</sup>, UAS-(GR)<sub>80</sub>/+</i>                   | <i>GMR-Gal4, Tub-Gal80<sup>ts</sup>, UAS-(GR)<sub>80</sub>/+</i>                        |
| F-L              | <i>GMR-Gal4, Gal80<sup>ts</sup>/UAS-GFP</i>                                    | <i>GMR-Gal4, Tub-Gal80<sup>ts</sup>/UAS-GFP</i>                                         |
|                  | <i>UAS-GFP/+</i>                                                               | <i>GMR-Gal4, Tub-Gal80<sup>ts</sup>, UAS-(GR)<sub>80</sub>/UAS-GFP</i>                  |
|                  | <i>UAS-TopoII RNAi-1/+</i>                                                     | <i>GMR-Gal4, Tub-Gal80<sup>ts</sup>, UAS-(GR)<sub>80</sub>/+; UAS-TopoII RNAi-1/+</i>   |
|                  | <i>UAS-TopoII RNAi-2/+</i>                                                     | <i>GMR-Gal4, Tub-Gal80<sup>ts</sup>, UAS-(GR)<sub>80</sub>/+; UAS-TopoII RNAi-2/+</i>   |
| <b>Figure S2</b> |                                                                                |                                                                                         |
| A                | +/+                                                                            | +/+                                                                                     |
|                  | <i>Mtk<sup>R1</sup>/Mtk<sup>R1</sup></i>                                       | <i>Mtk<sup>R1</sup>/Mtk<sup>R1</sup></i>                                                |
| B                | +/+                                                                            | +/+                                                                                     |
|                  | <i>Dpt<sup>SK1</sup>/Dpt<sup>SK1</sup></i>                                     | <i>Dpt<sup>SK1</sup>/Dpt<sup>SK1</sup></i>                                              |
| C                | <i>UAS-mCherry RNAi/+</i>                                                      | <i>GMR-Gal4, Tub-Gal80<sup>ts</sup>/+; UAS-mCherry RNAi/+</i>                           |
|                  | <i>UAS-Mtk RNAi-1/+</i>                                                        | <i>GMR-Gal4, Tub-Gal80<sup>ts</sup>/+; UAS-Mtk RNAi-1/+</i>                             |

|           |                                                                 |                                                                                       |
|-----------|-----------------------------------------------------------------|---------------------------------------------------------------------------------------|
|           | <i>UAS-Mtk RNAi-2/+</i>                                         | <i>GMR-Gal4, Tub-Gal80<sup>ts</sup>/UAS-Mtk RNAi-2</i>                                |
|           | <i>UAS-Mtk RNAi-3/+</i>                                         | <i>GMR-Gal4, Tub-Gal80<sup>ts</sup>/+; UAS-Mtk RNAi-3/+</i>                           |
| D and E   | <i>UAS-mCherry RNAi/+</i>                                       | <i>GMR-Gal4, Tub-Gal80<sup>ts</sup>, UAS-(GR)<sub>80</sub>/+; UAS-mCherry RNAi/+</i>  |
|           | <i>UAS-Hsp23 RNAi-1/+</i>                                       | <i>GMR-Gal4, Tub-Gal80<sup>ts</sup>, UAS-(GR)<sub>80</sub>/UAS-Hsp23 RNAi-1</i>       |
|           | <i>UAS-Hsp23 RNAi-2/+</i>                                       | <i>GMR-Gal4, Tub-Gal80<sup>ts</sup>, UAS-(GR)<sub>80</sub>/UAS-Hsp23 RNAi-2</i>       |
|           | <i>UAS-Hsp26 RNAi-1/+</i>                                       | <i>GMR-Gal4, Tub-Gal80<sup>ts</sup>, UAS-(GR)<sub>80</sub>/UAS-Hsp26 RNAi-1</i>       |
|           | <i>UAS-Hsp26 RNAi-2/+</i>                                       | <i>GMR-Gal4, Tub-Gal80<sup>ts</sup>, UAS-(GR)<sub>80</sub>/+; UAS-Hsp26 RNAi-2/+</i>  |
|           | <i>UAS-Hsp27 RNAi-1/+</i>                                       | <i>GMR-Gal4, Tub-Gal80<sup>ts</sup>, UAS-(GR)<sub>80</sub>/+; UAS-Hsp27 RNAi-1/+</i>  |
|           | <i>UAS-Hsp27 RNAi-2/+</i>                                       | <i>GMR-Gal4, Tub-Gal80<sup>ts</sup>, UAS-(GR)<sub>80</sub>/+; UAS-Hsp27 RNAi-2/+</i>  |
|           | <i>UAS-Hsp70 RNAi/+</i>                                         | <i>GMR-Gal4, Tub-Gal80<sup>ts</sup>, UAS-(GR)<sub>80</sub>/+; UAS-Hsp70 RNAi/+</i>    |
|           | <i>UAS-mCherry RNAi/+</i>                                       | <i>GMR-Gal4, Tub-Gal80<sup>ts</sup>/+; UAS-mCherry RNAi/+</i>                         |
|           | <i>UAS-Hsp23 RNAi-1/+</i>                                       | <i>GMR-Gal4, Tub-Gal80<sup>ts</sup>/UAS-Hsp23 RNAi-1</i>                              |
|           | <i>UAS-Hsp23 RNAi-2/+</i>                                       | <i>GMR-Gal4, Tub-Gal80<sup>ts</sup>/UAS-Hsp23 RNAi-2</i>                              |
|           | <i>UAS-Hsp26 RNAi-1/+</i>                                       | <i>GMR-Gal4, Tub-Gal80<sup>ts</sup>/UAS-Hsp26 RNAi-1</i>                              |
|           | <i>UAS-Hsp26 RNAi-2/+</i>                                       | <i>GMR-Gal4, Tub-Gal80<sup>ts</sup>/+; UAS-Hsp26 RNAi-2/+</i>                         |
|           | <i>UAS-Hsp27 RNAi-1/+</i>                                       | <i>GMR-Gal4, Tub-Gal80<sup>ts</sup>/+; UAS-Hsp27 RNAi-1/+</i>                         |
|           | <i>UAS-Hsp27 RNAi-2/+</i>                                       | <i>GMR-Gal4, Tub-Gal80<sup>ts</sup>/+; UAS-Hsp27 RNAi-2/+</i>                         |
|           | <i>UAS-Hsp70 RNAi/+</i>                                         | <i>GMR-Gal4, Tub-Gal80<sup>ts</sup>/+; UAS-Hsp70 RNAi/+</i>                           |
| F         | <i>UAS-mCherry RNAi/+</i>                                       | <i>GMR-Gal4, Tub-Gal80<sup>ts</sup>/+; UAS-mCherry RNAi/+</i>                         |
|           | <i>UAS-Hsp23 RNAi-1/+</i>                                       | <i>GMR-Gal4, Tub-Gal80<sup>ts</sup>/UAS-Hsp23 RNAi-1</i>                              |
|           | <i>UAS-Hsp23 RNAi-2/+</i>                                       | <i>GMR-Gal4, Tub-Gal80<sup>ts</sup>/UAS-Hsp23 RNAi-2</i>                              |
| G         | <i>UAS-mCherry RNAi/+</i>                                       | <i>GMR-Gal4, Tub-Gal80<sup>ts</sup>/+; UAS-mCherry RNAi/+</i>                         |
|           | <i>UAS-Hsp26 RNAi-1/+</i>                                       | <i>GMR-Gal4, Tub-Gal80<sup>ts</sup>/UAS-Hsp26 RNAi-1</i>                              |
|           | <i>UAS-Hsp26 RNAi-2/+</i>                                       | <i>GMR-Gal4, Tub-Gal80<sup>ts</sup>/+; UAS-Hsp26 RNAi-2/+</i>                         |
| H         | <i>UAS-mCherry RNAi/+</i>                                       | <i>GMR-Gal4, Tub-Gal80<sup>ts</sup>/+; UAS-mCherry RNAi/+</i>                         |
|           | <i>UAS-Hsp27 RNAi-1/+</i>                                       | <i>GMR-Gal4, Tub-Gal80<sup>ts</sup>/+; UAS-Hsp27 RNAi-1/+</i>                         |
|           | <i>UAS-Hsp27 RNAi-2/+</i>                                       | <i>GMR-Gal4, Tub-Gal80<sup>ts</sup>/+; UAS-Hsp27 RNAi-2/+</i>                         |
| I         | <i>UAS-mCherry RNAi/+</i>                                       | <i>GMR-Gal4, Tub-Gal80<sup>ts</sup>/+; UAS-mCherry RNAi/+</i>                         |
|           | <i>UAS-Hsp70 RNAi/+</i>                                         | <i>GMR-Gal4, Tub-Gal80<sup>ts</sup>/+; UAS-Hsp70 RNAi/+</i>                           |
| J         | <i>UAS-mCherry RNAi/+</i>                                       | <i>GMR-Gal4, Tub-Gal80<sup>ts</sup>/+; UAS-mCherry RNAi/+</i>                         |
|           | <i>UAS-Hsp90 RNAi/+</i>                                         | <i>GMR-Gal4, Tub-Gal80<sup>ts</sup>/+; UAS-Hsp90 RNAi/+</i>                           |
| K         | <i>+/+</i>                                                      | <i>GMR-Gal4, Tub-Gal80<sup>ts</sup>/+</i>                                             |
|           | <i>UAS-Hsp90/+</i>                                              | <i>GMR-Gal4, Tub-Gal80<sup>ts</sup>/UAS-Hsp90</i>                                     |
| L         | <i>UAS-mCherry RNAi/+</i>                                       | <i>GMR-Gal4, Tub-Gal80<sup>ts</sup>/+; UAS-mCherry RNAi/+</i>                         |
|           | <i>UAS-TopoII RNAi-1/+</i>                                      | <i>GMR-Gal4, Tub-Gal80<sup>ts</sup>/+; UAS-TopoII RNAi-1/+</i>                        |
|           | <i>UAS-TopoII RNAi-2/+</i>                                      | <i>GMR-Gal4, Tub-Gal80<sup>ts</sup>/+; UAS-TopoII RNAi-2/+</i>                        |
| Figure S3 |                                                                 |                                                                                       |
| A-D       | <i>GMR-Gal4, Gal80<sup>ts</sup>/UAS-GFP</i>                     | <i>GMR-Gal4, Tub-Gal80<sup>ts</sup>/UAS-GFP</i>                                       |
|           | <i>UAS-GFP/+</i>                                                | <i>GMR-Gal4, Tub-Gal80<sup>ts</sup>, UAS-(GR)<sub>80</sub>/UAS-GFP</i>                |
|           | <i>UAS-TopoII RNAi-1/+</i>                                      | <i>GMR-Gal4, Tub-Gal80<sup>ts</sup>, UAS-(GR)<sub>80</sub>/+; UAS-TopoII RNAi-1/+</i> |
|           | <i>UAS-TopoII RNAi-2/+</i>                                      | <i>GMR-Gal4, Tub-Gal80<sup>ts</sup>, UAS-(GR)<sub>80</sub>/+; UAS-TopoII RNAi-2/+</i> |
| Figure S4 |                                                                 |                                                                                       |
| A         | <i>elav, Gal80<sup>ts</sup>/+; UAS-Cont-(GR)<sub>80</sub>/+</i> | <i>elav-Gal4, Tub-Gal80<sup>ts</sup>/+; UAS-Control-(GR)<sub>80</sub>/+</i>           |
|           | <i>elav, Gal80<sup>ts</sup>, UAS-(GR)<sub>80</sub>/+</i>        | <i>elav-Gal4, Tub-Gal80<sup>ts</sup>, UAS-(GR)<sub>80</sub>/+</i>                     |
| B-D       | <i>GMR-Gal4, Gal80<sup>ts</sup>/UAS-GFP</i>                     | <i>GMR-Gal4, Tub-Gal80<sup>ts</sup>/UAS-GFP</i>                                       |
|           | <i>UAS-GFP/+</i>                                                | <i>GMR-Gal4, Tub-Gal80<sup>ts</sup>, UAS-(GR)<sub>80</sub>/UAS-GFP</i>                |
|           | <i>UAS-TopoII RNAi-1/+</i>                                      | <i>GMR-Gal4, Tub-Gal80<sup>ts</sup>, UAS-(GR)<sub>80</sub>/+; UAS-TopoII RNAi-1/+</i> |
|           | <i>UAS-TopoII RNAi-2/+</i>                                      | <i>GMR-Gal4, Tub-Gal80<sup>ts</sup>, UAS-(GR)<sub>80</sub>/+; UAS-TopoII RNAi-2/+</i> |
