# Supplementary material
Source: PubMed Central journal article supplement (PMC10264157)
Supplement: NIHMS1877990-supplement-Table_S2.pdf [file NIHMS1877990-supplement-Table_S2.pdf]

**Table S2. Primers used in this study (Related to the STAR Methods)**

|                                                                                                             |                             |     |
|-------------------------------------------------------------------------------------------------------------|-----------------------------|-----|
| Primer for <i>Drosophila TopoII</i><br>Forward: CACAGCGACAGAAGCATCAT<br>Reverse: ACGGATCCGATGTACGAGTC       | This paper                  | N/A |
| Primer for <i>Drosophila Mtk</i><br>Forward: CCACGGCTACATCAGTGCT<br>Reverse: CGGTCTTGTTGGTTAGGAT            | This paper                  | N/A |
| Primer for <i>Drosophila DptB</i><br>Forward: CTGGCATATGCTCCCAATTT<br>Reverse: GCTCAGATCGAATCCTTGCT         | This paper                  | N/A |
| Primer for <i>Drosophila AttC</i><br>Forward: ACTGACCAAACCCATACGC<br>Reverse: CTTGGCATCCAGATTGTGAA          | This paper                  | N/A |
| Primer for <i>Drosophila DptA</i><br>Forward: ACAATGGACGCCACGAGATT<br>Reverse: CCACTTTCCAGCTCGTTCT          | This paper                  | N/A |
| Primer for <i>Drosophila Drosocin</i><br>Forward: ATCACCTGACTCAAGCTGCC<br>Reverse: GGATGACTTCTCCGCGGTAT     | This paper                  | N/A |
| Primer for <i>Drosophila CecA2</i><br>Forward: TCTGGCCATCACCATTGGAC<br>Reverse: GTGTGCTGACCAACACGTTT        | This paper                  | N/A |
| Primer for <i>Drosophila Hsp23</i><br>Forward: TGCCCTTCTATGAGCCCTAC<br>Reverse: TCCTTTCCGATTTTCGACAC        | This paper                  | N/A |
| Primer for <i>Drosophila Hsp26</i><br>Forward: AGTTCAAGCCCAGTGAGCTC<br>Reverse: ACAAAGTGGCGCATGATGTG        | This paper                  | N/A |
| Primer for <i>Drosophila Hsp27</i><br>Forward: GACTGGGTCGTGCTGTTAT<br>Reverse: ACACCTGGAAGCCATCTTTG         | This paper                  | N/A |
| Primer for <i>Drosophila Hsp68</i><br>Forward: AGCAGCGAGATCAAGGATGT<br>Reverse: GAAGGTCTTGACTGCTTGC         | This paper                  | N/A |
| Primer for <i>Drosophila Hsp70Aa</i><br>Forward: CGATCCGGCTAAGAACCAGG<br>Reverse: GTGCTTCATGTCCTCTGCGA      | This paper                  | N/A |
| Primer for <i>Drosophila Hsp90 (Hsp83)</i><br>Forward: CAAGCAGCTGGTCTCTGTCA<br>Reverse: TCGAACTTGGCCTTGTCTC | This paper                  | N/A |
| Primer for <i>Drosophila Hsf</i><br>Forward: ATGTGAAAGTCATGCGGGGT<br>Reverse: CCACAGCACTTCGTTCTCT           | This paper                  | N/A |
| Primer for <i>Drosophila H2Av</i><br>Forward: CAAAATAGGCATTCCCATCG<br>Reverse: GCCAGCCATTTCTGTTCAAT         | This paper                  | N/A |
| Primer for <i>Drosophila Ku80</i><br>Forward: CCTGTACCTCCTGGTGCAT<br>Reverse: GGGCAGTAGCACAACCATTT          | Lopez-Gonzalez et al., 2019 | N/A |
| Primer for <i>Drosophila ATM</i><br>Forward: AAGGGCTAGTCGAGAATGA<br>Reverse: TTTAACTTGCCAGCGCTTTT           | This paper                  | N/A |
| Primer for <i>Drosophila p53</i><br>Forward: ACATGAGCCGGTCTGTAACC<br>Reverse: TTTCTTTTCGCCGATACAC           | This paper                  | N/A |
| Primer for <i>Drosophila poly(GR)</i><br>Forward: CTGCAACTACTGAAATCTGCCA<br>Reverse: CGTCGTCGTCCTTGAATCCA   | Yuva-Aydemir et al., 2019   | N/A |
| Primer for <i>Drosophila Actin42A</i><br>Forward: TCTTACTGAGCGCGGTTACAG                                     | This paper                  | N/A |

|                                                                                                               |            |     |
|---------------------------------------------------------------------------------------------------------------|------------|-----|
| Reverse: ATGTCGCGCACAAATTCAC                                                                                  |            |     |
| Primer for <i>Human TopoIIβ</i><br>Forward: ACCTGGGTGAACAATGCTGC<br>Reverse: ACCTCCCTGCAATTCATTCCT            | This paper | N/A |
| Primer for <i>Human HSP90AA1</i><br>Forward: AGGAGGTTGAGACGTTTCGC<br>Reverse: AGAGTTTCGATCTTGTGTTGTTCCGG      | This paper | N/A |
| Primer for <i>Human GAPDH</i><br>Forward: CGAGATCCCTCCAAAATCAA<br>Reverse: GTCTTCTGGGTGGCAGTGAT               | This paper | N/A |
| Primer for <i>Human HPRT</i><br>Forward: ATGGACAGGACTGAACGTCTT<br>Reverse: CTTGAGCACACAGAGGGCTA               | This paper | N/A |
| Control ASO:<br>mG*mC*mG*mA*mC*T*A*T*A*C*G*C*G*C*A*mA*mU*mA*mU*mG                                             | This paper | N/A |
| <i>HSP90AA1</i> ASO-1:<br>mU*mU*mU*mU*mC*T*T*C*A*G*C*C*T*C*A*mU*mC*mA*mU*mC                                   | This paper | N/A |
| <i>HSP90AA1</i> ASO-2:<br>mC*mC*mU*mC*mA*G*C*C*A*G*A*G*A*T*T*mA*mG*mU* mC*mU                                  | This paper | N/A |
| <i>TopoIIβ</i> ASO-1:<br>eA*eG*eC*eA*eG*G*T*C*T*G*T*A*G*T*T*eT*eG*eT*eA*eA                                    | This paper | N/A |
| <i>TopoIIβ</i> ASO-2:<br>eG*eA*eA*eT*eG*T*C*T*G*C*A*A*G*eT*eT*eT*eC*eA                                        | This paper | N/A |
| Primer for <i>HSP90AA1</i> ChIP, amplicon 1<br>Forward: gttcgggaggcttctggaaa<br>Reverse: gggacgctgaagcaactga  | This paper | N/A |
| Primer for <i>HSP90AA1</i> ChIP, amplicon 2:<br>Forward: aatggcagaaactgcggttag<br>Reverse: ctttgctgtttccttctg | This paper | N/A |
| Primer for <i>HSP90AA1</i> ChIP, amplicon 3:<br>Forward: acattaaagatggggcctga<br>Reverse: cttgttttggggacctca  | This paper | N/A |
